# Supplementary material for: Unveiling the Noncanonical Autophagy-Independent Role of ATG7 and ATG9B in Head and Neck Squamous Cell Carcinoma (HNSCC)
Source: Hindawi journal article supplement (doi:10.1155/2022/9253938), 2022-10-10
Supplement: f1 [file 9253938.f1.pdf]

# Supplementary Figure 1

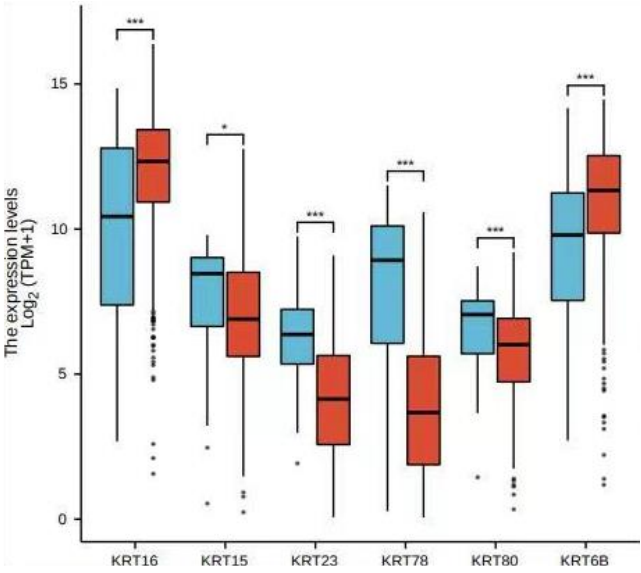

**Supplementary Figure 1. Expression of KRT genes in tumor and normal tissues in HNSCC in TCGA.**

## Supplementary Figure 2

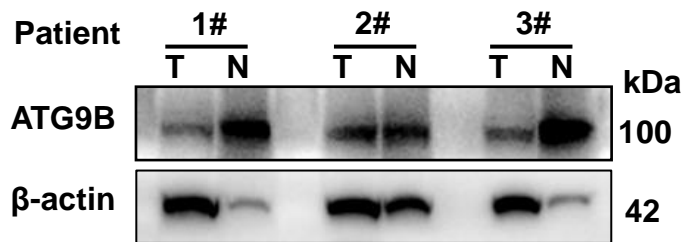

**Supplementary Figure 2. ATG9B protein levels in human HNSCC tissues and paired adjacent normal tissues. “T” for tumor tissues and “N” for adjacent normal tissues.**
